# Supplementary material
Source: PubMed Central journal article supplement (PMC4049789)
Supplement: cbt-15-735-s01.pdf [file cbt-15-735-s01.pdf]

## **Supplemental Material to:**

**Alessandra Cirillo, Anna Di Salle, Orsolina Petillo,  
Mariarosa AB Melone, Giovanna Grimaldi,  
Alfredo Bellotti, Giovanni Torelli, Maria Serena de' Santi,  
Giovanna Cantatore, Alfredo Marinelli, Umberto Galderisi,  
and Gianfranco Peluso**

**High grade glioblastoma is associated with aberrant  
expression of ZFP57, a protein involved in gene  
imprinting, and of CPT1A and CPT1C that regulate fatty  
acid metabolism**

**Cancer Biology & Therapy 2014; 15(6)**

**<http://dx.doi.org/10.4161/cbt.28408>**

**<http://www.landesbioscience.com/journals/cbt/article/28408/>**

**Table S1.** Primer pairs and experimental conditions for RT-PCR analyses.

| Primer         | Sequence 5' - 3'        | T <sub>annealing</sub> (°C) | cycles | MgCl <sub>2</sub> [mM] |
|----------------|-------------------------|-----------------------------|--------|------------------------|
| ZFP57 (1392)   | GCTTCCATTG CAGCAAGTCT T | 58                          | 33     | 1.5                    |
| ZFP57 (1548)   | TCCTTGCCTT TATAGCCCCT C |                             |        |                        |
| TRIM 28 (1319) | CACATTCTGC GCTTTGCCT    | 61                          | 28     | 1.5                    |
| TRIM28 (1462)  | AAACTTCATC TCGCCATGTG G |                             |        |                        |
| CPT1a (1399)   | CTGTGGAGAA AGCAGCGTTC T | 58                          | 33     | 1.5                    |
| CPT1a (1519)   | TCGTAACATCGGC CGTGTAGT  |                             |        |                        |
| CPT1b (1314)   | CTCCTATGAC CCCGAAGATG A | 59                          | 33     | 1.0                    |
| CPT1b (1444)   | TGAGACCCAA CTGGCCATT    |                             |        |                        |
| CPT1c (1042)   | GGCCATGGAG GACAAAGAGA A | 62                          | 30     | 1.0                    |
| CPT1c (1176)   | ATGTACAGCG CAAACAGGTG G |                             |        |                        |
